# Supplementary material
Source: HighWire-hosted journal article supplement (https://bmjopen.bmj.com/content/9/10/e032101)
Supplement: inline-supplementary-material-3 [file inline-supplementary-material-3.pdf]

### Supplementary file 3: Modified Evers checklist for methodological validity

Adapted from Evers S, Goossens M, et al. Criteria list for assessment of methodological quality of economic evaluations: Consensus on Health Economic Criteria. *Int J Technol Assess Health Care*. 2005;21(2):240-5.

| Item                                                                                                                | Yes                      | No                       | N/A                      |
|---------------------------------------------------------------------------------------------------------------------|--------------------------|--------------------------|--------------------------|
| 1. Is the study population clearly described?                                                                       | <input type="checkbox"/> | <input type="checkbox"/> | <input type="checkbox"/> |
| 2. Are competing alternatives clearly described?                                                                    | <input type="checkbox"/> | <input type="checkbox"/> | <input type="checkbox"/> |
| 3. Is a well-defined research question posed in answerable form?                                                    | <input type="checkbox"/> | <input type="checkbox"/> | <input type="checkbox"/> |
| 4. Is the economic study design appropriate to the stated objective?                                                | <input type="checkbox"/> | <input type="checkbox"/> | <input type="checkbox"/> |
| 5. Is the chosen time horizon appropriate to include relevant costs and consequences?                               | <input type="checkbox"/> | <input type="checkbox"/> | <input type="checkbox"/> |
| 6. Is the actual perspective chosen appropriate?                                                                    | <input type="checkbox"/> | <input type="checkbox"/> | <input type="checkbox"/> |
| 7. Are all important and relevant costs for each alternative identified?                                            | <input type="checkbox"/> | <input type="checkbox"/> | <input type="checkbox"/> |
| 8. Are all costs measured appropriately in physical units?                                                          | <input type="checkbox"/> | <input type="checkbox"/> | <input type="checkbox"/> |
| 9. Are costs valued appropriately?                                                                                  | <input type="checkbox"/> | <input type="checkbox"/> | <input type="checkbox"/> |
| 10. Are all important and relevant outcomes for each alternative identified?                                        | <input type="checkbox"/> | <input type="checkbox"/> | <input type="checkbox"/> |
| 11. Are all outcomes measured appropriately?                                                                        | <input type="checkbox"/> | <input type="checkbox"/> | <input type="checkbox"/> |
| 12. Are outcomes valued appropriately?                                                                              | <input type="checkbox"/> | <input type="checkbox"/> | <input type="checkbox"/> |
| 13. Is an incremental analysis of costs and outcomes of alternatives performed?                                     | <input type="checkbox"/> | <input type="checkbox"/> | <input type="checkbox"/> |
| 14. Are all future costs and outcomes discounted appropriately?                                                     | <input type="checkbox"/> | <input type="checkbox"/> | <input type="checkbox"/> |
| 15. Are all important variables, whose values are uncertain, appropriately subjected to sensitivity analysis?       | <input type="checkbox"/> | <input type="checkbox"/> | <input type="checkbox"/> |
| 16. Do the conclusions follow from the data reported?                                                               | <input type="checkbox"/> | <input type="checkbox"/> | <input type="checkbox"/> |
| 17. Does the study discuss the generalizability of the results to other settings and patient/ client groups?        | <input type="checkbox"/> | <input type="checkbox"/> | <input type="checkbox"/> |
| 18. Does the article indicate that there is no potential conflict of interest of study researcher(s) and funder(s)? | <input type="checkbox"/> | <input type="checkbox"/> | <input type="checkbox"/> |
| 19. Are ethical and distributional issues discussed appropriately?                                                  | <input type="checkbox"/> | <input type="checkbox"/> | <input type="checkbox"/> |
